# Supplementary material for: Enhanced Methylation Analysis by Recovery of Unsequenceable Fragments
Source: PLOS journal article supplement (doi:10.1371/journal.pone.0152322), 2016-03-31
Supplement: S11 (10.1371/journal.pone.0152322.s011) [file journal.pone.0152322.s011]

Enhanced methylation analysis of Plasmodium berghei by recovery of  
unsequenceable fragments

Gordon R. McInroy, Dario Beraldi, Eun-Ang Raiber, Katarzyna Modrzynska,  
Pieter van Delft, Oliver Billker, Shankar Balasubramanian

**Detailed Experimental Protocol**

1) DNA fragmentation

**Covaris M220 sonication**

Sonicate genomic DNA in 50uL 1X TE buffer (10mM TRIS-HCl pH 8.0, 0.1 mM EDTA) to an appropriate fragment size. E.g.: for 250 bp peak use the following settings: incident power 75 W, duty factor 10%, cycles per burst 200, treatment time 130s.

2) End Repair (NEB Next Kit)

|                   |       |                                        |
|-------------------|-------|----------------------------------------|
| DNA               | 1ug   | (in 85uL water or 10mM Tris-HCl pH7.4) |
| End repair buffer | 10uL  |                                        |
| End repair enzyme | 5uL   |                                        |
| Total             | 100uL |                                        |

- *Mix by gently pipetting entire volume up and down 10x*
- *Incubate for 30min at 20°C*
- *Purification (column or ampure beads)*
- *Elution in 44uL water*

3) A-tailing (NEB Next Kit)

|        |      |
|--------|------|
| DNA    | 42uL |
| Buffer | 5uL  |
| Enzyme | 3uL  |
| Total  | 50uL |

- *Mix by gently pipetting entire volume up and down 10x*
- *Incubate for 30min at 37°C*
- *Purification (column or ampure beads)*
- *Elution in 35uL water*

4) Ligation (Next Next Kit)

|                 |        |
|-----------------|--------|
| DNA             | 32.5uL |
| Ligation buffer | 10uL   |
| Adapter pair A  | 2.5uL  |
| Ligase          | 5uL    |
| Total           | 50uL   |

- Incubate for 20min at 20°C (r.t. is not 20°C)
- Add 1.6x ampure beads for removal of small DNA fragments
- Wash beads
- Elute with 22uL water, recover 20uL (max for oxBS workflow)

#### 5) Enter BS protocol

**Perform bisulfite conversion protocol of choice, following manufacturer instructions. Once converted DNA is purified, proceed to step 6). This protocol has been established using the EZ DNA Methylation-Gold Kit from Zymo Research.**

#### 6) Single extension (eg: with VeraSeq ultra or KAPA HiFi Uracil +)

|               |        |                            |
|---------------|--------|----------------------------|
| DNA           | 20uL   |                            |
| LM primer     | 5uL    | (10uM stock concentration) |
| dNTP          | 1uL    | (10mM stock concentration) |
| Buffer        | 10uL   |                            |
| VeraSeq Ultra | 0.5uL  |                            |
| Water         | 13.5uL |                            |
| <hr/>         |        |                            |
| Total         | 50uL   |                            |

*Denaturation*      95°C for 3 min  
*Annealing*        54°C for 45 sec  
*Extension*         74°C for 30 min

- Purification with 60uL streptavidin coated magnetic beads (Promega Magnasphere; 1 mg/mL)
  - o Wash 60uL beads with 1X BB (4x 300uL)
    - 10 mM Tris pH 7.5
    - 1 mM EDTA
    - 2M NaCl
    - 0.1% Tween-20
  - o Resuspend beads in 50uL 2X BB
  - o Add 50uL reaction mixture and incubate for 20 minutes at room temperature
  - o Wash beads with 1X BB (3x 300uL)

#### 7) End repair of singly adapted library

|                   |      |
|-------------------|------|
| End repair buffer | 10uL |
| End repair enzyme | 5uL  |
| Water             | 85uL |
| <hr/>             |      |
| Total             | 50uL |

- Incubate for 30min at 20°C
- Wash beads with 1X binding buffer (3x400uL)

#### 8) A-tailing

|        |      |
|--------|------|
| Buffer | 5uL  |
| Enzyme | 3uL  |
| Water  | 42uL |
| <hr/>  |      |
| Total  | 50uL |

- Incubate for 30min at 37°C
- Wash with 1X binding buffer (3x400uL)

#### 9) Ligation of adapter pair B (NEB Next Quick Ligation Module)

- Oligos 1b and 2b must be annealed to a final concentration of 25uM in 10mM Tris-HCl pH 7.4 and 50mM NaCl (annealing conditions as in Appendix 1b)

|                 |        |
|-----------------|--------|
| Ligation buffer | 10uL   |
| Adapter pair B  | 2.5uL  |
| Ligase          | 5uL    |
| Water           | 32.5uL |
| <hr/>           |        |
| Total           | 50uL   |

- Incubate for 20min at 20°C
- Wash with 1X BB (3x 300uL)
- Elution with 20uL NaOH (50mM, fresh dilution from 1M stock), 65°C for 15min

#### 10) qPCR with Kapa Master Mix

Quantify the library by qPCR with the KAPA quantification kit before sequencing.

#### Appendix: Annealing conditions for adapters:

Perform the following thermocycler program, with ramp rate at minimum (generally 0.1 °C/s)

|       |        |
|-------|--------|
| 95 °C | 15 min |
| 90 °C | 3 min  |
| 85 °C | 3 min  |
| 80 °C | 3 min  |
| 70 °C | 5 min  |
| 10 °C | 10 min |
| 4 °C  | hold   |
